1 **Runing title: Vaccine kunitz-candidates against schistosomiasis**

2

3 **Peptides derived of kunitz-type serine protease inhibitor as**

4 **potential vaccine against experimental schistosomiasis**

5 **Juan Hernández-Goenaga<sup>1†</sup>, Julio López-Abán<sup>1†</sup>, Anna V. Protasio<sup>2§</sup>, Belén**

6 **Vicente Santiago<sup>1</sup>, Esther del Olmo<sup>3</sup>, Magnolia Vanegas<sup>4</sup>, Pedro Fernández-Soto<sup>1</sup>,**

7 **Manuel Alfonso Patarroyo<sup>4</sup>, Antonio Muro<sup>1\*</sup>.**

8 <sup>1</sup>Infectious and Tropical Diseases Group (e-INTRO). IBSAL-CIETUS (Biomedical  
9 Research Institute of Salamanca-Research Centre for Tropical Diseases at the  
10 University of Salamanca), Faculty of Pharmacy, University of Salamanca, Salamanca,  
11 Spain.

12 <sup>2</sup>Wellcome Sanger Institute, Wellcome Genome Campus, Hinxton, CB10 1SA,  
13 Cambridge, UK.

14 <sup>3</sup>Department of Pharmaceutical Chemistry, IBSAL-CIETUS, Faculty of Pharmacy,  
15 University of Salamanca, Spain.

16 <sup>4</sup>Fundación Instituto de Inmunología de Colombia (FIDIC), Bogotá, Colombia.

17 § Current address: Cambridge Institute for Medical Research, University of Cambridge,  
18 Hills Road, CB2 0XY, United Kingdom.

19 † Equal contributors

20 **\*Correspondence**

21 Corresponding author: Antonio Muro and Julio López-Abán

22 ama@usal.es jlaban@usal.es

23 **Keywords:** *Schistosoma mansoni*, helminth vaccines, kunitz-type proteins, synthetic  
24 peptide, immunomodulator AA0029, ADAD vaccination system

25 **Abstract**

26 Schistosomiasis is a significant public health problem in sub-Saharan Africa, China,  
27 South-East Asia and regions of South and central America affecting about 189 million  
28 people. Kunitz-type serine protease inhibitors have been identified as important players  
29 in the interaction of other flatworm parasites with their mammalian hosts. Here, we  
30 evaluate the protective efficacy of chemically synthesized of T- and B-cell peptide  
31 epitopes derived from a kunitz protein from *Schistosoma mansoni*. Putative kunitz-type  
32 protease inhibitor proteins were identified in the *S. mansoni* genome and their  
33 expression analyzed by RNA-seq. Gene expression analyses showed that the kunitz  
34 protein Smp\_147730 (Syn. Smp\_311670) was dramatically and significantly up-  
35 regulated in schistosomula and adult worms when compared to the invading cercariae.  
36 T- and B-cell epitopes were predicted using bioinformatics tools, chemically  
37 synthesized and formulated in the Adjuvant Adaptation (ADAD) vaccination system.  
38 BALB/c mice were vaccinated and challenged with *S. mansoni* cercariae. Kunitz  
39 peptides were highly protective in vaccinated BALB/c mice showing significant  
40 reductions in recovery of adult females (89-91%), and in the numbers of eggs trapped in  
41 the livers (77-81%) and guts (57-77%) of mice. Moreover, liver lesions were  
42 significantly reduced in vaccinated mice (64-65%) compared to infected control mice.  
43 The vaccination regime was well tolerated with both peptides. We propose the use of

44 these peptides, alone or in combination, as reliable candidates for vaccination against  
45 schistosomiasis.

46

## 47 **Introduction**

48 Human schistosomiasis is a water-borne debilitating disease caused by a trematode  
49 of the genus *Schistosoma*. It is estimated that 240 million people worldwide are infected  
50 with *Schistosoma* spp. which causes the loss of 1.5 million DALYs (Disability Adjusted  
51 Life Years) per year (1). In 1994, the WHO (World Health Organization) together with  
52 the *Schistosoma* Genome Network started a project aimed to sequencing the *S. mansoni*  
53 genome, which was published in 2009 (2) alongside the *Schistosoma japonicum*  
54 genome (3). Three years later the genome of *S. haematobium* was described (4).  
55 Schistosomes' genome size is relatively large 409.5 Mbp for *S. mansoni*, 376 Mbp for  
56 *S. haematobium* and 403 Mbp for *S. japonicum* due to the presence of a large number of  
57 repetitive sequences (40-45%).

58 In recent years, high-throughput (next generation) sequencing technologies have  
59 provided a large amount of data on covering different aspects of schistosome biology.  
60 For example, genome sequencing of multiple isolates has revealed the complex  
61 population biology of schistosomes (5-6), and RNA-seq transcriptomic studies have  
62 allowed a better understanding of the gene expression patterns during these parasites'  
63 life cycle (7-12). These data are made available to the research community via databases  
64 such as GeneDB, SchistoDB and WormbaseParasite (13-15).

65 The most interesting schistosome proteins are those related to host-parasite  
66 interactions (16), since they are accessible to the effector mechanisms of the host's

67 immune system and may be targets for development of drugs and vaccines against these  
68 helminths. There are two promising groups: parasite surface proteins and excretory-  
69 secretory proteins. The latter category includes several proteases (serine, cysteine and  
70 aspartic proteases) (17) as well as some protease inhibitors that ensure the survival of  
71 the parasite by inhibiting host proteases enzymes (18). MEROPS, a database of  
72 proteases and inhibitors, contains 1008 annotated entries for human proteases and  
73 homologs (19). The recent availability of the genome sequences of different mammals  
74 has allowed the identification of their entire protease composition, termed “degradome”,  
75 and its comparison with the human counterpart. The Degradome Database lists 569  
76 human proteases and homologs classified into 68 families (20). A plethora of proteins  
77 has been proposed as potential vaccines against schistosomiasis, but only Sm14 and  
78 SmTSP-2 vaccines for *S. mansoni* have reached Phase I clinical trials and only the  
79 glutathione-S transferase rSh28GST (Bilhvax) against *S. haematobium* has reached  
80 Phase III (21).

81 Kunitz-type protease inhibitors belong to the family of serine protease inhibitors that  
82 are found in almost all organisms. They are small proteins containing around sixty  
83 amino acid residues (17) and have one or more kunitz motif:  $\alpha + \beta$  with two  $\beta$  strands  
84 and two short  $\alpha$  helices at the end of the domain. This domain also has three disulfide  
85 bonds between six conserved cysteines (22). Kunitz proteins have been involved in  
86 various physiological processes as blood coagulation, fibrinolysis, inflammation and ion  
87 channel blocking (17). However, there is limited information regarding kunitz-type  
88 protease inhibitors of parasitic helminths. These molecules have been described in  
89 *Fasciola hepatica* (23), *Echinococcus granulosus* (24) and *Ancylostoma* spp (25) and  
90 could to be reliable antigens for vaccine design. Kunitz-type protease inhibitors have  
91 been identified in the genomes of the three major *Schistosoma* spp, but only SjKI-1

92 from *S. japonicum* and SmKI-1 from *S. mansoni* have been expressed and functionally  
93 characterized (26-27). Recently, recombinant *S. mansoni* kunitz protein (rSmKI-1)  
94 formulated with Freund's adjuvant was shown to induce partial protection against  
95 C57BL/b mice infected with *S. mansoni* (28). A strategy to design vaccines is based on  
96 the use of conserved peptides involved in critical physiological processes able to  
97 interact with major histocompatibility complex (MHC) class I and II molecules and  
98 drive protective immune responses. Minimal antigen epitopes with 13-18 amino acid  
99 long peptides can be designed to trigger B- and T cell immune responses and we can  
100 synthesize them chemically (29-30).

101 The aim of this study was to explore *S. mansoni* genome *in silico* to identify kunitz-  
102 type serine protease inhibitors and to study their expression profile in different life  
103 stages by RNA-seq, and to compare them with kunitz protein sequences from other  
104 schistosomes and other helminths. One kunitz T- and B-cell epitope were predicted,  
105 chemically synthesized and further tested as potential vaccine candidates against *S.*  
106 *mansoni* in mice

## 107 **Materials and Methods**

### 108 **Animals and parasites**

109 Seven-week-old SPF female BALB/c mice (Charles River, Lyon, France) weighing  
110 18-20 g were allocated in standard cages with food and water *ad libitum*, light/dark  
111 cycle of 12/12 h and 22-25°C. Animal procedures complied with the Spanish  
112 (L 32/2007, L 6/2013 and RD 53/2013) and the European Union (Di 2010/63/CE)  
113 regulations. The Ethics Committee of the University of Salamanca approved animal use  
114 protocols (Ref. 15/0018). The size of groups was calculated by power analysis using

115 “size.fdr” package in R and following the 3Rs recommendations (31-32). The animals’  
116 health status was monitored during the experiments according to FELASA guidelines.  
117 *S. mansoni* was maintained in *Biomphalaria glabrata* snails as intermediate hosts and  
118 CD1 mice as definitive hosts. The number of cercariae and their viability were  
119 determined using a stereoscopic microscope (Olympus SZX9, Japan).

## 120 **Kunitz-type protease inhibitors study in *Schistosoma mansoni* genome**

121 Amino acid sequences of all putative kunitz domain containing proteins of  
122 *S. mansoni* were retrieved from GeneDB and SchistoDB (14-15). Sequences containing  
123 at least six cysteines were kept for further analyses and aligned with other kunitz  
124 proteins from *S. japonicum*, *S. haematobium*, *E. granulosus*, *E. multilocularis* and  
125 *F. hepatica* available from GeneDB, SchistoDB, GenBank (33) and WormBase ParaSite  
126 (13). Amino acid identity between sequences was analyzed using alignments generated  
127 with Clustal Omega on line web-server (34) and then visually edited with BioEdit  
128 software v7.1.3 (35). Potential secretory signal peptides were predicted with SignalP 4.1  
129 online tool (36) with a D-cutoff value of 0.45. Transmembrane helix regions in the  
130 sequences were predicted using TMHMM server v2.0 (37). GPI-anchored potential was  
131 estimated using fragAnchor (38).

## 132 **Kunitz gene expression in *S. mansoni* in cercariae, schistosomula and adults**

133 RNA-seq data from Protasio et al (7) was used to investigate the expression profile  
134 of proteins with kunitz motifs. Fastq files corresponding to samples with accession  
135 numbers ERR022873, ERR022874, ERR022876-78 and ERR022880-81 were retrieved  
136 from [www.ena.ac.uk](http://www.ena.ac.uk); reads were mapped to the latest version of the *S. mansoni* genome  
137 WBPS12 ([https://parasite.wormbase.org/Schistosoma\\_mansoni\\_prjea36577/](https://parasite.wormbase.org/Schistosoma_mansoni_prjea36577/)) using  
138 HISAT2 v2.1.0 (39) with default parameters except for “-no-mixed -no-discordant”.

139 Output SAM files were converted, sorted and indexed using SAMTOOLS v1.9 (40).  
140 Gene annotation as GFF was obtained from Wormbase ParaSite and corresponds to the  
141 database release WBPS12. A GTF version of the annotation was produced using  
142 GFFREAD from the CUFFLINKS suite v2.2.1 (41) with options “-F -T”. Counts per  
143 gene were computed using FEATURECOUNTS from the SUBREAD v1.6.3 package  
144 (42) with default parameters except for “-primary -fraction -t exon -g gene\_id”. Counts  
145 per gene were further processed using DESeq2 v1.16.1 (43) and visualization of gene  
146 expression changes were produced using Integrative Genomics Viewer (IGV) (44) and  
147 Tror GGLOT2 (45) implemented in R (46).

148 A touchdown PCR (TD-PCR) was developed using the Smp\_147730 sequence (Syn.  
149 Smp\_311670). The reaction was optimised in 25  $\mu$ L reaction mix containing: 2  $\mu$ L of  
150 DNA extracted from *S. mansoni* adults, 13  $\mu$ L H<sub>2</sub>O, 2.5  $\mu$ L 10x reaction buffer, 2.5  $\mu$ L  
151 MgCl<sub>2</sub> (25 mM), 2.5  $\mu$ L, dNTPs MIX (25 mM/dNTP), 1  $\mu$ L (10 pmol) of each primer  
152 and 0.5  $\mu$ L of Taq-polymerase 2,5 U (iNtRON Biotechnology, Inc). The program  
153 consisted of one cycle at 94°C 1 min, six cycles 94°C for 20 sec and a touchdown  
154 program of 15 cycles with successive annealing temperature decrement from 65°C to  
155 60°C for 30 sec with 1°C decrement with a final extension at 72°C 10 min performed in  
156 a Mastercycler Gradient (Eppendorf). The products were monitored using 1.5 % agarose  
157 gel electrophoresis stained with ethidium bromide, visualized under UV light and then  
158 photographed (Gel documentation system, UVItec, UK). The DNA insert obtained was  
159 sequenced by the Sanger method at the Sequencing Service of the University of  
160 Salamanca.

161

162

163 **B and T-cell peptide prediction and chemical synthesis from *S. mansoni* kunitz**  
164 **protease inhibitor**

165 The genetic sequence of the proposed kunitz protease inhibitor gene Smp\_147730  
166 (currently Smp\_311670 in WBPS12 -  
167 [https://parasite.wormbase.org/Schistosoma\\_mansoni\\_prjea36577/](https://parasite.wormbase.org/Schistosoma_mansoni_prjea36577/)) was analysed *in*  
168 *silico* to identify potential B-and T-cell epitopes that could be soluble and easy to  
169 manufacture. Peptide SmKT was designed to induce a good T-cell response using the  
170 SYFPEITHI database (47) and the Immune Epitope Database (IEDB) (48), good MHC  
171 class II binders were searched for murine H2-E<sup>d</sup> and human HLA-DRB1. Sequences  
172 with scores more than 20 in predictions based on k-mers of length 15 were selected. The  
173 BebiPred server, based on hidden Markov models (HMM), was used for predicting  
174 linear B-cell epitopes (BebiPred 1.0b). Prediction score is based on hydrophilicity and  
175 secondary structure prediction (49). The Predicted linear B-cell epitope was compared  
176 with the results found using the ANTHERPROT 3D software, which takes antigenicity,  
177 hydrophobicity, flexibility and solvent accessibility into account (50). A 20 amino acids  
178 region displaying the best score for each protein was selected as promising linear B-cell  
179 epitopes.

180 The predicted T and B-cell epitopes (referred to as SmKT and SmKB respectively)  
181 were chemically synthesized at Fundación Instituto de Inmunología de Colombia  
182 (FIDIC) (Bogotá, Colombia) by the solid-phase peptide synthesis according to  
183 Merrifield (51) and Houghten (52) using the t-Boc strategy and  $\alpha$ -benzyhydramine  
184 (BHA) resin (0.7 meq/mg). One cysteine and a glycine residue were added at both  
185 amino and carboxyl-terminal ends to allow their polymerization via oxidization.  
186 Peptides were purified by reverse phase high performance liquid chromatography  
187 characterized by MALDI-TOF mass spectrometry and lyophilized. Freeze-dried



188 synthetic peptides were re-suspended in phosphate buffered solution (PBS) and  
189 concentrations were determined with a BCA kit of Pierce (Rockford, IL). Peptide  
190 toxicity was determined in J774.2 mouse peritoneal macrophage cell line cultures. Cell  
191 viability was measured by CytoTox 96® Non-Radioactive Cytotoxicity Assay  
192 (Promega) (53).

193

#### 194 **Vaccination trial using the ADAD vaccination system**

195 Twenty-one female BALB/c mice were randomly allocated in four groups: Untreated  
196 and uninfected group (n=3), Adjuvant treated and infected group (AA0029+Qs) (n=6),  
197 SmKT vaccinated and infected group (AA0029+Qs+SmKT) (n=6) and SmKB  
198 vaccinated and infected group (AA0029+Qs+SmKB) (n=6). Mice received three  
199 vaccinations at 2-week intervals. SmKT and SmKB were formulated in the Adjuvant  
200 Adaptation (ADAD) vaccination system with non-hemolytic saponins from *Quillaja*  
201 *saponaria* (Qs; Sigma) and the synthetic aliphatic diamine AA0029 emulsified in a non-  
202 mineral oil (Montanide ISA763A, SEPPIC) with a 70/30 oil/water ratio. The ADAD  
203 vaccination system is administered using two subcutaneous injections. The first  
204 injection containing AA0029 and Qs emulsified in Montanide and the second injection,  
205 administered 5 days after the first, contains the antigen with AA0029 and Qs in the  
206 emulsion oil. Individual doses per injection in mice included 100 µg of AA0029, 20 µg  
207 of Qs and 10 µg of either SmKT or SmKB in a final 100 µL volume of emulsion with  
208 Montanide (54-55). Mice were weighed and monitored for signs of anaphylactic shock,  
209 erythema at the injection point and changes in behavior. Vaccinated and infection  
210 control mice were percutaneously challenged with  $150 \pm 8$  *S. mansoni* cercariae two  
211 weeks after the third vaccination. Mice were restrained with a mixture of 50 mg/kg  
212 ketamine (Imalgene1000, Merial), 5 mg/kg diazepam (Valium10, Roche Farma SA) and

213 1 mg/kg atropine (B. Braun, Madrid) administrated intraperitoneally. The abdomen was  
214 shaved and wetted with sterile water and then exposed to cercariae for 45 minutes using  
215 a ring (55). All mice were euthanized with a lethal dose of 60 mg/kg of pentobarbital  
216 plus 2 IU/mL of heparin and then perfused aseptically with PBS and heparin  
217 (500 IU/L). Paired worms as well as single males or females were obtained from the  
218 portal and mesenteric veins by portal perfusion at 8 weeks post-challenge. The liver and  
219 small intestine were digested in 5% KOH (w/v) overnight at 37°C with shaking and  
220 eggs per gram were counted three times using a McMaster chamber by two different  
221 researchers. The spleen, gut and liver weights were recorded. Liver injury was assessed  
222 by the number of granulomas in the surface determined by two pathologist  
223 independently using three micrographs (Olympus SZX9) and ImageJ 1.45 software  
224 (56).

#### 225 **Humoral immune response by ELISA**

226 Soluble *S. mansoni* adult worm antigens (SoSmAWA) were prepared for ELISA  
227 (55). Twenty adult worms per mL were suspended in sterile PBS with a protease  
228 inhibitor cocktail (Complete Mini EDTA-Free, Roche 04 693 159 001). The mixture  
229 was homogenized, frozen and thawed, sonicated and then centrifuged at 30,000 g for 30  
230 min at 4°C. Supernatant protein concentration was determined using Micro BCA  
231 Protein Assay Kit. Blood samples were collected from mice before immunization and  
232 infection, and at the necropsy and analysed by indirect ELISA to detect specific IgG,  
233 IgG1 and IgG2a antibodies anti-SmKT, -SmKB and -SoSmAWA. A Corning Costar 96-  
234 well microplate (Cambridge, MA) was coated with 1 µg/mL of each peptide and  
235 SoSmAWA. The plates were then blocked with 2% of bovine serum albumin (Sigma) in  
236 PBS with 0.05% Tween 20 (PBST) for 1 h at 37°. Sera samples diluted at 1:100 in  
237 PBST were added in duplicate wells and incubated 1 h 37°C. Goat anti-mouse IgG-

238 HRP, IgG1-HRP or IgG2a-HRP conjugates (Sigma) were used at 1:1000 in PBST and  
239 incubated 1 h at 37°C. The plates were washed and developed adding H<sub>2</sub>O<sub>2</sub> (0.012%)  
240 and orthophenylenediamine substrate (0.04%) in 0.1 M citrate/phosphate buffer pH 5.0.  
241 The reaction was stopped with 3 N H<sub>2</sub>SO<sub>4</sub> and read at 492 nm on a MultiSkan GO  
242 ELISA plate reader (Thermo Fisher Scientific, Vantaa).

243

#### 244 **Parasitological and immunological data analyses**

245 Data were expressed as the mean and standard error of the mean (SEM) and were  
246 tested for normality by the Kolmogorov-Smirnov test and homogeneity of variance by  
247 the Bartlett test. A one-way ANOVA test and multiple *post-hoc* comparisons with  
248 Tukey's honest significance tests (HSD) or Kruskal-Wallis (K-W) tests were performed  
249 to analyze statistical differences among groups. A value of  $P < 0.05$  was considered  
250 statistically significant. Statistical analyses were performed with SIMFIT Statistical  
251 Package 7.4.1 (Manchester University, U. K. <https://simfit.org.uk>) and SPSS 21  
252 software (IBM).

253

## 254 **Results**

255 While the initial identification of kunitz domain containing proteins in *S. mansoni*  
256 was performed using the former v5.0 of the *S. mansoni* genome assembly (7), an  
257 updated and improved version the assembly was released during the production of this  
258 manuscript. Gene accession numbers have change between these two versions. The  
259 original accession numbers (found in v5.0) used to access nucleotide and amino acid  
260 sequences in different steps described in the methods of this manuscript were  
261 maintained as much as possible to allow cross-referencing with existing literature.

262 However, wherever possible and appropriate, bioinformatics analyses were updated to  
263 confirm previous results against the new genome assembly and annotation (WBPS12,  
264 [https://parasite.wormbase.org/Schistosoma\\_mansoni\\_prjea36577/](https://parasite.wormbase.org/Schistosoma_mansoni_prjea36577/)).

265

### 266 **Kunitz-type protease inhibitors study of *Schistosoma mansoni***

267 The *S. mansoni* genome and gene annotation repositories (GeneDB and SchistoDB)  
268 were searched for all kunitz protein sequences. A total of 11 sequences were retrieved  
269 with putative kunitz domains in the *S. mansoni* genome. Only three sequences of  
270 potential interest remain in V 5.0: Smp\_147730, Smp\_139840 and Smp\_012230. After  
271 a close analysis of their amino acid sequence only Smp\_147730 (currently  
272 Smp\_311670.1) contained a bona fide kunitz-domain identified between residues 26 to  
273 79 with the six highly conserved cysteine residues capable to establish three disulphide  
274 bonds, found in the range of 50-70 amino acids. In addition, a signal peptide was  
275 predicted in the first 21 amino acids of Smp\_147730 (Syn. Smp\_311670) with a D-  
276 score of 0.855 according with SignalP 4.1 (36). The cleavage site was located between  
277 positions 20-21 where Y-score showed the highest value (Y=0.828). In consequence,  
278 residues 1-20 were removed from the B- and T-cell peptide prediction. No  
279 transmembrane or GPI anchor domains were found with TMHMM server v2.0 (57).

280 A new version of the *S. mansoni* genome (version 7, unpublished, available from  
281 [https://parasite.wormbase.org/Schistosoma\\_mansoni\\_prjea36577/Info/Index/](https://parasite.wormbase.org/Schistosoma_mansoni_prjea36577/Info/Index/), database  
282 version WBPS12) was released during the preparation of this manuscript. The gene  
283 Smp\_147730 has been renamed Smp\_311670 and it is predicted to produce two  
284 alternative transcripts. The sequence of Smp\_311670.1 is identical to our confirmed  
285 kunitz protein sequence while Smp\_311670.2 represents a longer alternative transcript.

286

287 **Comparison of Smp\_147730 (Syn. Smp\_311670) with trematode kunitz proteins**

288 The Smp\_147730 (Syn. Smp\_311670) sequence was compared to other putative  
289 kunitz proteins of Platyhelminthes identified in sequence databases. There were seven  
290 sequences retrieved from GeneDB of *S. japonicum* but only four had a six-cysteine  
291 kunitz domain with an identity ranging between 26.05 and 42.03% (Fig. 1A). Two out  
292 of eight *S. haematobium* sequences present in SchistoDB did not include a kunitz  
293 domain and the identity of the remaining proteins to Smp\_147730 (Syn. Smp\_311670)  
294 ranged between 18.05 and 74.62% (Fig. 1B). Seven kunitz protein sequences in  
295 GeneBank were attributed to *E. granulosus* but only five have a kunitz domain and  
296 identities ranged 15.45 to 37.33% (Fig. 1C). There were six sequences sharing the  
297 domain available in GeneBank from *E. multilocularis* with identities from 14.41 to  
298 35.80% out a total of eight retrieved (Fig. 1D). Three identical *F. hepatica* sequences  
299 were identified in WormBase ParaSite each presenting a kunitz domain and sharing  
300 32.93% residue identity with Smp\_147730 (Fig. 1E).

301

302 **Transcriptome analysis and differential expression of Smp\_147730 (Syn.**  
303 **Smp\_311670) kunitz gene**

304 Smp\_311670 is located in Chromosome 2 (37,805,700 and 37,811,500, forward  
305 strand) of the WBPS12 *S.mansoni* genome assembly. Transcriptome analysis by RNA-  
306 seq showed that Smp\_311670.2 was significantly up-regulated (adjusted p-value < 0.01)  
307 in 24 hours schistosomula and adult worms with respect to cercariae. (Fig. 2,  
308 Supplementary Table 1. No significant difference was found between cercariae and 3-  
309 hours-schistosomula (Supplementary Table1).

310 Primers were designed to amplify Smp\_147730 DNA (Syn. Smp\_311670) sequence  
311 using *S. mansoni* adult DNA, Forw. 5'-TACTGACAGGGCTCACTACGCT-3' and  
312 Rev. 5'-ACGCTCGCCTTCACACCCC-3' by TD-PCR, the amplified region spanned  
313 exon 1 and 2. A 1444 bp insert was obtained and purified by agarose gel  
314 electrophoresis, quantified and sequenced (Fig. 3A). A consensus sequence was  
315 obtained using Bioedit software and compared through BLAST to sequences recorded  
316 in databases.

317

### 318 **T- and B-cell epitope prediction and toxicity assessment**

319 The online servers SYFPEITHI (<http://www.syfpeithi.de> (47)) and Immune Epitope  
320 Database (IEDB) (<http://www.immuneepitope.org/> (48)) resulted in the prediction of a  
321 15- amino acids T-cell peptide (SmKT) in position 66-80 of Smp\_147730 (Syn.  
322 Smp\_311670) with a score of 22 for H2-Ed and score of 20 for HLA-DRB1\*0401  
323 inside the kunitz domain (Fig 3B). A 20-amino acid B-cell peptide (SmKB) was  
324 predicted located on residues 94-114 by BepiPred server  
325 (<http://www.cbs.dtu.dk/services/BepiPred> (47)) and ANTHEPROT ([http://antheprot-](http://antheprot-pbil.ibcp.fr)  
326 [pbil.ibcp.fr](http://antheprot-pbil.ibcp.fr) (50)) outside of the kunitz domain (Fig 3B). Peptides were obtained with  
327 purity more than 90%. Each peptide was assayed ranging from 1 to 50 µg/mL for *in*  
328 *vitro* cytotoxicity evaluation to J774.2 mouse macrophages. Results showed that more  
329 than 90% of macrophages were still viable after three days of treatment with SmKT and  
330 SmKB peptides in all conditions.

331

332

333        **Vaccination with SmKT and SmKB in ADAD with AA0029 triggers protection**  
334 **against *S. mansoni* infection**

335        The capacity of SmKT and SmKB to induce protection in BALB/c mice against  
336 *S. mansoni* infection was evaluated. SmKT, T-cell peptide, formulated in ADAD with  
337 the synthetic immunomodulator AA0029 induced higher levels of protection measured  
338 by worm recovery with especially high reduction in the number of female worms  
339 collected by perfusion (91%;  $P = 0.0002$ ) (Table 1). Also, significant reduction in  
340 number of eggs present in the liver (77%;  $P = 0.0044$ ) and in the small intestine (57%;  
341  $P = 0.0208$ ) were detected (Table 1). Liver damage evaluated by the numbers of  
342 granulomas on the hepatic surface was also significantly reduced (65%;  $P = 0.0041$ )  
343 compared with controls (Figure 4). BALB/c mice immunized with the SmKB B-cell  
344 peptide, also showed a high reduction in female worms (89%;  $P = 0.0003$ ) (Table 1),  
345 pronounced decreases in the number of eggs present in the liver (81%;  $P = 0.0030$ ) and  
346 in the intestine (77%;  $P = 0.0028$ ) (Table 1), as well as a reduced number of granulomas  
347 in the liver (64%;  $P = 0.0044$ ) (Figure 4). Both vaccine candidates (SmKT and SmKB)  
348 showed comparable protection in terms of eggs trapped in tissues and liver lesions. No  
349 signs of anaphylactic shock, erythema or changes in behavior were observed in  
350 vaccinated mice with either peptide. No mice died during the trial. Slight subcutaneous  
351 traces of the emulsion were observed at the point of injection.

352

353        **Immunogenicity of *S. mansoni* kunitz SmKT and SmKB peptides and immune**  
354 **response against SoSmAWA by ELISA**

355        Indirect ELISA tests were performed to examine the ability of SmKT and SmKB to  
356 induce humoral immune responses. A significantly higher production of specific anti-

357 SmKB IgG was observed in the AA0029+Qs+SmKB vaccinated group compared to  
358 uninfected group after the second immunization ( $P = 0.0030$ ), which was maintained  
359 until the end of the experiment (Figure 5A). By contrast, no increase of specific anti-  
360 SmKT IgG antibodies was observed in AA0029+Qs+SmKT or in AA0029+Qs+SmKB  
361 vaccinated mice (Figure 5B). Although antibodies to SmKT were detected after  
362 challenged, these were lower than those elicited by SmKB (Figure 5).

363 Specific IgG, IgG1 and IgG2a responses against soluble worm antigen (SoSmAWA)  
364 were studied using an indirect ELISA. All infected groups showed an increase in total  
365 IgG production to SoSmAWA at 8 weeks post-challenge ( $0.584 \pm 0.118$ – $0.720 \pm 0.107$ )  
366 compared to the uninfected group ( $0.250 \pm 0.064$ ). All infected groups showed a  
367 significant higher production of IgG1 (ANOVA  $F_{(3,17)} 4.565$   $P=0.0160$ ) at 8 weeks post-  
368 challenge ( $0.746 \pm 0.117$ – $0.851 \pm 0.107$ ) in comparison with uninfected group  
369 ( $0.263 \pm 0.005$ ). By contrast, no significant increase of IgG2a antibodies to SoSmAWA  
370 was found during the experiment compared with uninfected group.

371

## 372 **Discussion**

373 Important progress combating schistosomiasis have been made from 2013 to 2016 as  
374 reflected in the reduction of case numbers from 290 to 190 million (1, 58). This  
375 decrease in disease burden was mainly achieved through mass preventive chemotherapy  
376 with large-scale praziquantel administration complemented with safe water supplies,  
377 sanitation, hygiene education and snail control. There is increasing pressure for the  
378 developing of new anti-schistosomiasis drugs. Praziquantel, the drug of choice for  
379 schistosomiasis, has limitations because it acts only against the adult stage of the  
380 schistosome life cycle. In addition, there are mayor concerns regarding the emergence



381 of drug resistance and/or reduced susceptibility to praziquantel due to its extensive use  
382 (59). Meanwhile, the development of a vaccine against this parasite is still high in the  
383 research agenda because it would complement the use of praziquantel to reduce disease,  
384 stop transmission and eradicate the disease. Purified or recombinant proteins from  
385 schistosomes, host-parasite interface antigens in tegument or gastrodermis, or genome  
386 mining by reverse vaccinology have been tested as vaccine candidates but only  
387 glutathione-S transferase rSh28GST (Bilhvac) have reached Phase III clinical trials  
388 (60).

389 Schistosome kunitz-type serine protease inhibitors have been associated to successful  
390 invasion, migration and development of the parasite in their host. They act by  
391 neutralizing the destructive action of host proteases on the invading schistosome (61). In  
392 other trematodes the secretion/release of proteins with kunitz domains interfere with the  
393 maturation of host dendritic cells and regulate host proteases resulting in impairment of  
394 defense responses (17). The kunitz protein SmKI-1 isolated from *S. mansoni* was found  
395 in excretory-secretory products and tegument of adults as well as eggs. It was observed  
396 that it also impairs neutrophil chemotaxis and elastase activity, coagulation and  
397 inflammation mechanisms in the host inducing immune evasion to ensure their survival.  
398 Moreover, the recombinant SmKI-1 delayed blood clot formation, inhibited several  
399 trypsin proteases but had no effect on pancreatic elastase or cathepsins (27). Therefore  
400 kunitz proteins are desirable new targets for vaccine development against schistosomes.  
401 Recombinant rSmKI-1 has previously been tested as a vaccine candidate as well as  
402 fragments involving the kunitz domain and the C-terminal tail (28, 62).

403 The potential of kunitz domain containing proteins as vaccines led us to study the  
404 published sequences of these genes in the three main schistosome species (63). We  
405 found 11 candidate DNA sequences containing the kunitz domain in several genome

406 annotations of *S. mansoni* but only Smp\_147730 (Syn. Smp\_311670) had a six-cysteine  
407 residue characteristic of a *bona fide* kunitz domain. Also, we compared Smp\_147730  
408 (Syn. Smp\_311670) with predicted kunitz type proteins available in database from  
409 *S. haematobium*, *S. japonicum*, *E. granulosus*, *E. multilocularis* and *F. hepatica*. The  
410 identity of the sequence with *S. haematobium* was the highest, up to 74% but in the  
411 other parasites was much lower, up 43%. This indicates that although the structure of  
412 kunitz domain was preserved in the different species these proteins could evolve  
413 separately and could be species-specific. These sequence differences correspond with  
414 the wide functional diversity of kunitz proteins in several species (64).

415 We focused on Smp\_147730 (Syn. Smp\_311670), studying its expression by RNA-  
416 seq and its identification by PCR in the *S. mansoni* strain maintained in our laboratory.  
417 We observed high expression of Smp\_147730 (Syn. Smp\_311670) after the  
418 transformation from cercaria to schistosomulum and even higher expression in the adult  
419 stage suggesting a role in schistosomulum development and the prolonged exposure in  
420 portal mesenteric veins of adults. The skin- or lung- migrating schistosomula and adult  
421 stages are regarded as major targets to design vaccines against schistosomes (65). With  
422 this in mind, our strategy was to design new synthetic high affinity peptide candidates  
423 composed of a short chain of amino acids containing the specific antigen determinant  
424 against functional regions that the parasite needs to survive (66). Several epitopes  
425 included in a vaccine would trigger humoral and cellular protective response using an  
426 adequate adjuvant or delivery system (67). We designed a T-cell peptide of 15 amino  
427 acids (SmKT), candidate from Smp\_147730 sequence (Syn. Smp\_311670), able to  
428 stimulate mouse and human MHC class II and a linear B-cell peptide of 20 amino acids  
429 (SmKB) based in physicochemical properties able to produce a humoral response.  
430 These *in silico* analyses are considered feasible, fast, and accurate in designing subunit

431 vaccines against infectious diseases and could produce safer vaccines that are easier to  
432 manufacture and store than conventional ones (68). We formulated these two candidate  
433 peptides in the Adjuvant Adaptation (ADAD) vaccination system because adjuvants are  
434 recognized to have crucial importance in vaccine development. This adjuvant approach  
435 is a long-term delivery system feasible to use in vaccine development against helminths  
436 overcoming the issues of the experimental Freund's adjuvant (54-55).

437 We next examined whether T- and B-cell epitopes could induce protection in  
438 BALB/c mouse experimental schistosomiasis. Both SmKT and SmKB candidates  
439 conferred a protection in terms of reduction in female worms, eggs trapped in tissues  
440 and liver lesions. These peptides could be useful to reduce liver granuloma pathology,  
441 and severe colonic damage and polyps. Fewer eggs in intestines could lead to less  
442 passage of eggs in feces and consequently could reduce transmission. The protection is  
443 higher than those obtained with the approaches of Morais et al (28) (34-43%) and  
444 Ranasinghe et al (69) (36-47%) using the whole recombinant rSmKI-1 or with the C-  
445 terminal-tail fragment (28-30%) (28) using Quil A with CBA mouse model or Freund's  
446 adjuvant and C57BL/6 mice. While these different levels of protection could be  
447 explained by differences in adjuvant and animal model they all indicate the potential of  
448 Smp\_147730 (Syn. Smp\_311670) as good vaccine candidate. Our peptides seem to act  
449 against female worms leading to lower production of eggs and fewer lesions. Curiously  
450 our SmKT peptide of 15 -mer including only two cysteines of the conserved kunitz  
451 domain induced protection when the KI-fragment of 62 -mer involving three cysteines  
452 conserving the inhibitory activity against trypsin and neutrophil elastase tested by  
453 Morais et al (28) did not. Moreover, the SmKT induced weak antibody response with  
454 only significant increase at week 8 post-infection. This apparent incongruence could be  
455 related with the fact that conserved regions involved in critical biological functions for

456 the parasite are poorly antigenic but interesting to develop immune response or to  
457 increase vaccine efficacy (30). On the other hand, SmKB peptide of 20 -mer and the C-  
458 terminal-tail fragment with 67 -mer containing the antiprotease activity used by Morais  
459 et al (28) indicating the value of B-cell mediated antibody response in schistosomiasis  
460 (62). Vaccination with SmKB induced a high production of specific IgG, contributing to  
461 control of adult phase as it was described in natural resistance to infection in people  
462 living in hyperendemic areas (70-72) and experimental models (73).

463

#### 464 **Conclusion**

465 Here we provide evidence for the protective capacity of two peptides SmKT and  
466 SmKB derived from kunitz proteins of *S. mansoni*. These peptides induced reduction in  
467 female worms, eggs in tissues and hepatic damage when administered subcutaneously  
468 formulated in the ADAD vaccination system. A single epitope vaccine could be  
469 insufficient to trigger a high level of protection, thus the combination with other  
470 synergic candidates in a multi-antigen vaccine must be tested in order to improve  
471 protection against *S. mansoni*.

472

473 **Competing interest.**

474 The authors declare that they have no competing interests. Sponsors had no role in  
475 study design, or collection, analysis and interpretation of data.

476

477 **Acknowledgements**

478 We thank Parasite Genomics Group from Wellcome Sanger Institute, particularly to  
479 Matt Berriman (Group Leader) and James Cotton for the critical review of the draft. We  
480 thank the Sequencing Service and Animal Experimentation (Reg. # PAE/SA/001)  
481 facilities of the University of Salamanca. We thank Alba Torres Valle for her technical  
482 help in *S. mansoni* life cycle, ELISA and animal management. Montanide ISA763A was  
483 a gift of MSD Animal Health, Carbajosa de la Sagrada, Salamanca, Spain.

484

485 **Data Availability** Statement: All relevant data are within the manuscript and its  
486 Supporting Information files.

487

488 **Funding:** This study was supported by the Institute of Health Carlos III, ISCIII,  
489 Spain ([www.isciii.es](http://www.isciii.es)), grants: RICET RD16/0027/0018, PI16/01784, European Union  
490 cofinancing by FEDER (Fondo Europeo de Desarrollo Regional) ‘Una manera de hacer  
491 Europa’

492

493

494 **References**

- 495 1. GBD 2016 Disease and Injury Incidence and Prevalence Collaborators. Global,  
496 regional, and national incidence, prevalence, and years lived with disability for  
497 328 diseases and injuries for 195 countries, 1990-2016: a systematic analysis for  
498 the Global Burden of Disease Study 2016. *Lancet*. 2017;390:1211-1259. doi:  
499 10.1016/S0140-6736(17)32154-2. PMID: 28919117
- 500 2. Berriman M, Haas BJ, LoVerde PT, Wilson RA, Dillon GP, Cerqueira GC, et al. The  
501 genome of the blood fluke *Schistosoma mansoni*. *Nature*. 2009;460:352-8. doi:  
502 10.1038/nature08160. PMID: 19606141
- 503 3. Zhou Y, Zheng H, Chen Y, Zhang L, Wang K, Guo J, et al. The *Schistosoma*  
504 *japonicum* genome reveals features of host-parasite interplay. *Schistosoma*  
505 *japonicum* Genome Sequencing and Functional Analysis Consortium. *Nature*.  
506 2009;460:345-51. doi: 10.1038/nature08140. PMID: 19606140
- 507 4. Young ND, Jex AR, Li B, Liu S, Yang L, Xiong Z, Li Y, Cantacessi C, Hall RS, Xu  
508 X, Chen F, Wu X, Zerlotini A, Oliveira G, Hofmann A, Zhang G, Fang X, Kang  
509 Y, Campbell BE, Loukas A, Ranganathan S, Rollinson D, Rinaldi G, Brindley PJ,  
510 Yang H, Wang J, Wang J, Gasser RB. Whole-genome sequence of *Schistosoma*  
511 *haematobium*. *Nat Genet*. 2012;44:221-5. doi: 10.1038/ng.1065. PMID: 22246508
- 512 5. Crellen T, Allan F, David S, Durrant C, Huckvale T, Holroyd N, Emery AM,  
513 Rollinson D, Aanensen DM, Berriman M, Webster JP, Cotton JA. Whole genome  
514 resequencing of the human parasite *Schistosoma mansoni* reveals population  
515 history and effects of selection. *Sci Rep*. 2016;6:20954. doi: 10.1038/srep20954.  
516 PMID: 26879532

- 517 6. Young ND, Chan KG, Korhonen PK, Min Chong T, Ee R, Mohandas N, Koehler  
518 AV, Lim YL, Hofmann A, Jex AR, Qian B, Chilton NB, Gobert GN, McManus  
519 DP, Tan P, Webster BL, Rollinson D, Gasser RB. Exploring molecular variation  
520 in *Schistosoma japonicum* in China. *Sci Rep.* 2015;5:17345. doi:  
521 10.1038/srep17345. PMID: 26621075
- 522 7. Protasio AV, Tsai IJ, Babbage A, Nichol S, Hunt M, Aslett MA, De Silva N, Velarde  
523 GS, Anderson TJ, Clark RC, Davidson C, Dillon GP, Holroyd NE, LoVerde PT,  
524 Lloyd C, McQuillan J, Oliveira G, Otto TD, Parker-Manuel SJ, Quail MA, Wilson  
525 RA, Zerlotini A, Dunne DW, Berriman M. A systematically improved high  
526 quality genome and transcriptome of the human blood fluke *Schistosoma*  
527 *mansoni*. *PLoS Negl Trop Dis.* 2012;6:e1455. doi: 10.1371/journal.pntd.0001455.  
528 PMID: 22253936
- 529 8. Almeida GT, Amaral MS, Beckedorff FC, Kitajima JP, DeMarco R & Verjovski-  
530 Almeida S. Exploring the *Schistosoma mansoni* adult male transcriptome using  
531 RNA-seq. *Exp Parasitol.* 2012;132:22-31. doi: 10.1016/j.exppara.2011.06.010.  
532 PMID: 21745473
- 533 9. Piao X, Cai P, Liu S, Hou N, Hao L, Yang F, Wang H, Wang J, Jin Q, Chen Q.  
534 Global expression analysis revealed novel gender-specific gene expression  
535 features in the blood fluke parasite *Schistosoma japonicum*. *PLoS One.*  
536 2011;6:e18267. doi: 10.1371/journal.pone.0018267. PMID: 21494327
- 537 10. Portela J, Grunau C, Cosseau C, et al. Whole-genome in-silico subtractive  
538 hybridization (WISH)—using massive sequencing for the identification of unique  
539 and repetitive sex-specific sequences: the example of *Schistosoma mansoni*. *BMC*  
540 *Genomics.* 2010;11:387. doi: 10.1186/1471-2164-11-387. PMID: 20565937

- 541 11. Protasio AV, Dunne DW, Berriman M. Comparative study of transcriptome profiles  
542 of mechanical- and skin-transformed *Schistosoma mansoni* schistosomula. *PLoS*  
543 *Negl Trop Dis.* 2013;7:e2091. doi: 10.1371/journal.pntd.0002091. PMID:  
544 23516644
- 545 12. Protasio AV, van Dongen S, Collins J, Quintais L, Ribeiro DM, Sessler F, Hunt M,  
546 Rinaldi G, Collins JJ, Enright AJ, Berriman M. MiR-277/4989 regulate  
547 transcriptional landscape during juvenile to adult transition in the parasitic  
548 helminth *Schistosoma mansoni*. *PLoS Negl Trop Dis.* 2017;11:e0005559. doi:  
549 10.1371/journal.pntd.0005559. PMID: 28542189
- 550 13. Howe KL, Bolt BJ, Shafie M, Kersey P, Berriman M. WormBase ParaSite - a  
551 comprehensive resource for helminth genomics. *Mol Biochem Parasitol.*  
552 2017;215:2-10. doi: 10.1016/j.molbiopara.2016.11.005. PMID: 27899279
- 553 14. Zerlotini A, Aguiar ER, Yu F, Xu H, Li Y, Young ND, Gasser RB, Protasio AV,  
554 Berriman M, Roos DS, Kissinger JC, Oliveira G. SchistoDB: an updated genome  
555 resource for the three key schistosomes of humans. *Nucleic Acids Res.*  
556 2013;41:D728-31. doi: 10.1093/nar/gks1087. PMID: 23161692
- 557 15. Logan-Klumpler FJ, De Silva N, Boehme U, Rogers MB, Velarde G, McQuillan JA,  
558 Carver T, Aslett M, Olsen C, Subramanian S, Phan I, Farris C, Mitra S,  
559 Ramasamy G, Wang H, Tivey A, Jackson A, Houston R, Parkhill J, Holden M,  
560 Harb OS, Brunk BP, Myler PJ, Roos D, Carrington M, Smith DF, Hertz-Fowler  
561 C, Berriman M. GeneDB--an annotation database for pathogens. *Nucleic Acids*  
562 *Res.* 2012;40:D98-108. doi: 10.1093/nar/gkr1032. PMID: 22116062
- 563 16. Braschi S, Wilson R A. Proteins exposed at the adult schistosome surface revealed  
564 by biotinylation. *Mol Cell Proteomics.* 2006;5:347-56. PMID: 16269422



- 565 17. Ranasinghe SL, McManus DP. Protease Inhibitors of Parasitic Flukes: Emerging  
566 Roles in Parasite Survival and Immune Defence. *Trends Parasitol.* 2017;33:400-  
567 413. doi: 10.1016/j.pt.2016.12.013. PMID: 28089171
- 568 18. Zhang X, Maizels RM (2001) Serine proteinase inhibitors from nematodes and the  
569 arms race between host and pathogen. *Trends Biochem Sci.* 2001;26:191-7.  
570 PMID: 11246026
- 571 19. Rawlings ND, Barrett AJ, Thomas PD, Huang X, Bateman A, Finn RD. The  
572 MEROPS database of proteolytic enzymes, their substrates and inhibitors in 2017  
573 and a comparison with peptidases in the PANTHER database. *Nucleic Acids Res.*  
574 2018;46(D1):D624-D632. doi: 10.1093/nar/gkx1134. PMID: 29145643
- 575 20. Pérez-Silva JG, Español Y, Velasco G, Quesada V. The Degradome database:  
576 expanding roles of mammalian proteases in life and disease. *Nucleic Acids Res.*  
577 2016;44(D1):D351-5. doi: 10.1093/nar/gkv1201. PMID: 26553809
- 578 21. Merrifield M, Hotez PJ, Beaumier CM, Gillespie P, Strych U, Hayward T, Bottazzi  
579 ME. Advancing a vaccine to prevent human schistosomiasis. *Vaccine.*  
580 2016;34:2988-2991. doi: 10.1016/j.vaccine.2016.03.079. PMID: 27036511
- 581 22. Nixon AE, Wood CR. Engineered protein inhibitors of proteases. *Curr Opin Drug*  
582 *Discov Devel.* 2006;9:261-8. PMID: 16566296
- 583 23. Bozas SE, Panaccio M, Creaney J, Dosen M, Parsons JC, Vlasuk GV, Walker ID,  
584 Spithill TW. Characterisation of a novel Kunitz-type molecule from the trematode  
585 *Fasciola hepatica*. *Mol Biochem Parasitol.* 1995;74:19-29. PMID: 8719242
- 586 24. Ranasinghe SL, Fischer K, Zhang W, Gobert GN, McManus DP. Cloning and  
587 Characterization of Two Potent Kunitz Type Protease Inhibitors from

- 588 Echinococcus granulosus. PLoS Negl Trop Dis. 2015;9:e0004268. doi:  
589 10.1371/journal.pntd.0004268. PMID: 26645974
- 590 25. Hawdon JM, Datu B, Crowell M. Molecular cloning of a novel multidomain  
591 Kunitz-type proteinase inhibitor from the hookworm Ancylostoma caninum. J  
592 Parasitol. 2003;89:402-7. PMID: 12760667
- 593 26. Ranasinghe SL, Fischer K, Gobert GN, McManus DP. A novel coagulation  
594 inhibitor from Schistosoma japonicum. Parasitology. 2015;142:1663-72. doi:  
595 10.1017/S0031182015001328. PMID: 26463744
- 596 27. Ranasinghe SL, Fischer K, Gobert GN, McManus DP. Functional expression of a  
597 novel Kunitz type protease inhibitor from the human blood fluke Schistosoma  
598 mansoni. Parasit Vectors. 2015;8:408. doi: 10.1186/s13071-015-1022-z. PMID:  
599 26238343.
- 600 28. Morais SB, Figueiredo BC, Assis NRG, Homan J, Mambelli FS, Bicalho RM,  
601 Souza C, Martins VP, Pinheiro CS, Oliveira SC. Schistosoma mansoni SmKI-1 or  
602 Its C-Terminal Fragment Induces Partial Protection Against S. mansoni Infection  
603 in Mice. Front Immunol. 2018;9:1762. doi: 10.3389/fimmu.2018.01762. PMID:  
604 30105029.
- 605 29. Stern LJ, Calvo-Calle JM. HLA-DR: molecular insights and vaccine design. Curr  
606 Pharm Des. 2009;15:3249-61. PMID: 19860674.
- 607 30. Patarroyo ME, Patarroyo MA. Emerging rules for subunit-based, multiantigenic,  
608 multistage chemically synthesized vaccines. Acc Chem Res. 2008;41:377-86. doi:  
609 10.1021/ar700120t. PMID: 18266328.
- 610 31. Charan J, Kantharia ND. How to calculate sample size in animal studies? J  
611 Pharmacol Pharmacother. 2013;4:303-6. PMID: 24250214.

- 612 32. Festing MF, Altman DG. Guidelines for the design and statistical analysis of  
613 experiments using laboratory animals. *ILAR J.* 2002;43:244-58. PMID:  
614 12391400.
- 615 33. Miryala SK, Anbarasu A, Ramaiah S. Discerning molecular interactions: A  
616 comprehensive review on biomolecular interaction databases and network  
617 analysis tools. *Gene.* 2018;642:84-94. doi: 10.1016/j.gene.2017.11.028. PMID:  
618 29129810.
- 619 34. Sievers F, Higgins DG. Clustal Omega, accurate alignment of very large numbers of  
620 sequences. *Methods Mol Biol.* 2014;1079:105-16. doi: 10.1007/978-1-62703-646-  
621 7\_6. PMID: 24170397 ([www.ebi.ac.uk/Tools/msa/clustalo/](http://www.ebi.ac.uk/Tools/msa/clustalo/)).
- 622 35. Hall TA. BioEdit: a user-friendly biological sequence alignment editor and analysis  
623 program for Windows 95/98/NT. *Nucl Acids Symp Ser.* 1999;41:95-98.
- 624 36. Nielsen H. Predicting Secretory Proteins with SignalP. *Methods Mol Biol.*  
625 2017;1611:59-73. doi: 10.1007/978-1-4939-7015-5\_6. PMID: 28451972.
- 626 37. Reddy A, Cho J, Ling S, Reddy V, Shlykov M, Saier MH. Reliability of nine  
627 programs of topological predictions and their application to integral membrane  
628 channel and carrier proteins. *J Mol Microbiol Biotechnol.* 2014;24:161-90. doi:  
629 10.1159/000363506. PMID: 24992992.
- 630 38. Poisson G, Chauve C, Chen X, Bergeron A. FragAnchor: a large-scale predictor of  
631 glycosylphosphatidylinositol anchors in eukaryote protein sequences by  
632 qualitative scoring. *Genomics Proteomics Bioinformatics.* 2007;5:121-30. PMID:  
633 17893077.

- 634 39. Kim D, Langmead B, Salzberg SL. HISAT: a fast spliced aligner with low memory  
635 requirements. *Nat Methods*. 2015;12:357-60. doi: 10.1038/nmeth.3317.  
636 PMID:25751142.
- 637 40. Li H, Handsaker B, Wysoker A, Fennell T, Ruan J, Homer N, Marth G, Abecasis G,  
638 Durbin R; 1000 Genome Project Data Processing Subgroup. The Sequence  
639 Alignment/Map format and SAMtools. *Bioinformatics*. 2009;25:2078-9. doi:  
640 10.1093/bioinformatics/btp352. PMID: 19505943.
- 641 41. Trapnell C, Roberts A, Goff L, Pertea G, Kim D, Kelley DR, Pimentel H, Salzberg  
642 SL, Rinn JL, Pachter L. Differential gene and transcript expression analysis of  
643 RNA-seq experiments with TopHat and Cufflinks. *Nat Protoc*. 2012;7:562-78.  
644 doi: 10.1038/nprot.2012.016. PMID: 22383036.
- 645 42. Liao Y, Smyth GK, Shi W. The Subread aligner: fast, accurate and scalable read  
646 mapping by seed-and-vote. *Nucleic Acids Res*. 2013;41:e108. doi:  
647 10.1093/nar/gkt214. PMID: 23558742.
- 648 43. Love MI, Huber W, Anders S. Moderated estimation of fold change and dispersion  
649 for RNA-seq data with DESeq2. *Genome Biol*. 2014;15:550. PMID: 25516281.
- 650 44. Thorvaldsdóttir H, Robinson JT, Mesirov JP. Integrative Genomics Viewer (IGV):  
651 high-performance genomics data visualization and exploration. *Brief Bioinform*.  
652 2013;14:178-92. doi: 10.1093/bib/bbs017. PMID: 22517427.
- 653 45. Wickham H. *ggplot2: Elegant Graphics for Data Analysis*. Springer-Verlag, New  
654 York, 2009.
- 655 46. R Core Team. *R: A language and environment for statistical computing*. [Internet].  
656 Vienna: R Foundation for Statistical Computing; 2017 [Updated 2019 Mar 11;  
657 cited 2019 Mar 20] Available from <https://www.R-project.org/>.

- 658 47. Rammensee H, Bachmann J, Emmerich NP, Bachor OA, Stevanović S.  
659 SYFPEITHI: database for MHC ligands and peptide motifs. Immunogenetics.  
660 1999;50:213-9. PMID: 10602881.
- 661 48. Fleri W, Paul S, Dhanda SK, Mahajan S, Xu X, Peters B, Sette A. The Immune  
662 Epitope Database and Analysis Resource in Epitope Discovery and Synthetic  
663 Vaccine Design. Front Immunol. 2017;8:278. doi: 10.3389/fimmu.2017.00278.  
664 PMID: 28352270.
- 665 49. Parker JM, Guo D, Hodges RS (1986). New hydrophilicity scale derived from high-  
666 performance liquid chromatography peptide retention data: correlation of  
667 predicted surface residues with antigenicity and X-ray-derived accessible sites.  
668 Biochemistry. 1986;25:5425-32. PMID: 2430611.
- 669 50. Deléage G, Combet C, Blanchet C, Geourjon C (2001) ANTHEPROT: an  
670 integrated protein sequence analysis software with client/server capabilities.  
671 Comput Biol Med. 2001;31:259-67. PMID: 2430611.
- 672 51. Merrifield RB. Solid-phase peptide synthesis. Adv Enzymol Relat Areas Mol Biol.  
673 1969;32:221-96. PMID: 4307033.
- 674 52. Houghten RA. General method for the rapid solid-phase synthesis of large numbers  
675 of peptides: specificity of antigen-antibody interaction at the level of individual  
676 amino acids. Proc Natl Acad Sci U S A. 1985;82:5131-5. PMID: 2410914.
- 677 53. Rojas-Caraballo J, López-Abán J, Pérez del Villar L, Vizcaíno C, Vicente B,  
678 Fernández-Soto P, del Olmo E, Patarroyo MA, Muro A. In vitro and in vivo  
679 studies for assessing the immune response and protection-inducing ability  
680 conferred by Fasciola hepatica-derived synthetic peptides containing B- and T-

- 681 cell epitopes. PLoS One. 2014;9:e105323. doi: 10.1371/journal.pone.0105323.  
682 PMID: 25122166.
- 683 54. Martínez-Fernández AR, Nogal-Ruiz JJ, López-Abán J, Ramajo V, Oleaga A,  
684 Manga-González Y, Hillyer GV, Muro A. Vaccination of mice and sheep with  
685 Fh12 FABP from *Fasciola hepatica* using the new adjuvant/immunomodulator  
686 system ADAD. Vet Parasitol. 2004;126:287-98. PMID: 15567592.
- 687 55. Vicente B, López-Abán J, Rojas-Caraballo J, del Olmo E, Fernández-Soto P, Muro  
688 A. Protection against *Schistosoma mansoni* infection using a *Fasciola hepatica*-  
689 derived fatty acid binding protein from different delivery systems. Parasit Vectors.  
690 2016;9:216. doi: 10.1186/s13071-016-1500-y. PMID: 27090442.
- 691 56. Schneider CA, Rasband WS, Eliceiri KW. NIH Image to ImageJ: 25 years of image  
692 analysis. Nat Methods. 2012;9:671-5. PMID: 22930834.
- 693 57. Krogh A, Larsson B, von Heijne G, Sonnhammer EL. Predicting transmembrane  
694 protein topology with a hidden Markov model: application to complete genomes.  
695 J Mol Biol. 2001;305:567-80. PMID: 11152613.
- 696 58. Global Burden of Disease Study Group 2013. Global, regional, and national  
697 incidence, prevalence, and years lived with disability for 301 acute and chronic  
698 diseases and injuries in 188 countries, 1990-2013: a systematic analysis for the  
699 Global Burden of Disease Study 2013. Lancet. 2015;386:743-800. doi:  
700 10.1016/S0140-6736(15)60692-4. PMID: 26063472.
- 701 59. Mutapi F, Maizels R, Fenwick A, Woolhouse M. Human schistosomiasis in the post  
702 mass drug administration era. Lancet Infect Dis. 2017;17:e42-e48. doi:  
703 10.1016/S1473-3099(16)30475-3. PMID: 27988094.

- 704 60. Alsallaq RA, Gurarie D, Ndeffo Mbah M, Galvani A, King C. Quantitative  
705 assessment of the impact of partially protective anti-schistosomiasis vaccines.  
706 PLoS Negl Trop Dis. 2017;11:e0005544. doi: 10.1371/journal.pntd.0005544.  
707 PMID: 28410369.
- 708 61. Quezada LA, McKerrow JH. Schistosome serine protease inhibitors: parasite  
709 defense or homeostasis? An Acad Bras Cienc. 2011;83:663–72. PMID: 21670886.
- 710 62. Morais SB, Figueiredo BC, Assis NRG, Alvarenga DM, de Magalhães MTQ,  
711 Ferreira RS, Vieira AT, Menezes GB, Oliveira SC. Schistosoma mansoni SmKI-1  
712 serine protease inhibitor binds to elastase and impairs neutrophil function and  
713 inflammation. PLoS Pathog. 2018;14:e1006870. doi:  
714 10.1371/journal.ppat.1006870. PMID: 29425229.
- 715 63. International Helminth Genomes Consortium. Comparative genomics of the major  
716 parasitic worms. Nat Genet. 2019;51:163-174. doi: 10.1038/s41588-018-0262-1.  
717 PMID: 30397333.
- 718 64. Fló M, Margenat M, Pellizza L, Graña M, Durán R, Báez A, Salceda E, Soto E,  
719 Alvarez B, Fernández C. Functional diversity of secreted cestode Kunitz proteins:  
720 Inhibition of serine peptidases and blockade of cation channels. PLoS Pathog.  
721 2017;13:e1006169. doi: 10.1371/journal.ppat.1006169. PMID: 28192542.
- 722 65. McWilliam HE, Driguez P, Piedrafita D, McManus DP, Meeusen EN. Discovery of  
723 novel Schistosoma japonicum antigens using a targeted protein microarray  
724 approach. Parasit Vectors. 2014;7:290. doi: 10.1186/1756-3305-7-290. PMID:  
725 24964958.
- 726 66. Skwarczynski M, Toth I. Peptide-based synthetic vaccines. Chem Sci. 2016;7:842-  
727 854. doi: 10.1039/c5sc03892h. PMID: 28791117.

- 728 67. Yang H, Kim DS. Peptide Immunotherapy in Vaccine Development: From Epitope  
729 to Adjuvant. *Adv Protein Chem Struct Biol.* 2015;99:1-14. doi:  
730 10.1016/bs.apcsb.2015.03.001. PMID: 26067814.
- 731 68. Curtidor H, Patarroyo ME, Patarroyo MA. Recent advances in the development of a  
732 chemically synthesised anti-malarial vaccine. *Expert Opin Biol Ther.*  
733 2015;15:1567-81. doi: 10.1517/14712598.2015.1075505. PMID: 26239009.
- 734 69. Ranasinghe SL, Duke M, Harvie M, McManus DP. Kunitz-type protease inhibitor  
735 as a vaccine candidate against schistosomiasis mansoni. *Int J Infect Dis.*  
736 2018;66:26-32. doi: 10.1016/j.ijid.2017.10.024. PMID: 29128645.
- 737 70. Alves CC, Araujo N, dos Santos VC, Couto FB, Assis NR, Morais SB, Oliveira SC,  
738 Fonseca CT. Sm29, but not Sm22.6 retains its ability to induce a protective  
739 immune response in mice previously exposed to a *Schistosoma mansoni* infection.  
740 *PLoS Negl Trop Dis.* 2015;9:e0003537. PMID: 25723525.
- 741 71. McManus DP, Loukas A. Current status of vaccines for schistosomiasis. *Clin*  
742 *Microbiol Rev.* 2008;21:225–42. PMID: 18202444.
- 743 72. Melo TT, Sena IC, Araujo N, Fonseca CT. Antibodies are involved in the protective  
744 immunity induced in mice by *Schistosoma mansoni* schistosomula tegument  
745 (Smtteg) immunization. *Parasite Immunol.* 2014;36:107–11. PMID: 24558655.
- 746 73. El-Shabasy EA, Reda ES, Abdeen SH, Said AE, Ouhtit A. Transmission electron  
747 microscopic observations on ultrastructural alterations in *Schistosoma mansoni*  
748 adult worms recovered from C57BL/6 mice treated with radiation-attenuated  
749 vaccine and/or praziquantel in addition to passive immunization with normal and  
750 vaccinated rabbit sera against infection. *Parasitol Res.* 2015;114:1563–80. PMID:  
751 25786393



752

753 **Figure captions**

754

755 **Figure 1.** Comparison of sequence Smp\_147730 (Syn. Smp\_311670) from  
756 *S. mansoni* in a multiple sequence alignment with kunitz-type proteins from *S.*  
757 *japonicum* (A), *S. haematobium* (B), *Echinococcus granulosus* (C), *E. multilocularis*  
758 (D) and *Fasciola hepatica* (E). Kunitz domain positions are highlighted in red boxes.

759

760 **Figure 2.** Visualisation of Smp\_311670.1 in its genome context and gene expression.  
761 (A) Coverage plots for adult worms and 24-hours-schistosomula are shown using  
762 Integrative Genomics Viewer (IGV). Three-hours schistosomula and cercariae are  
763 omitted for clarity. (B) Relative gene expression of Smp\_311660.2 is represented as a  
764 Log<sub>2</sub> Fold Change relative to cercariae (Ce), 24-hour-schistosomula (Sc) and adult  
765 (Ad), \*\*  $P < 0.01$ .

766

767 **Figure 3.** Sequences of Smp-147730 (Syn. Smp\_311670) of *Schistosoma mansoni*:  
768 (A) Agarose gel electrophoresis insert of 1444 base pairs (bp) obtained by PCR from  
769 two adult DNA samples (A1 and A2) with negative control (C-) and mass scale (mM).  
770 (B) Amino acid sequence and alignment with Clustal Omega of predicted T-cell peptide  
771 (SmKT) and B-cell peptide (SmKB).

772

773

774 **Figure 4.** Effect on liver lesion of vaccination with SmKT and SmKB formulated in  
775 the Adjuvant Adaptation (ADAD) vaccination system with the synthetic  
776 immunomodulator AA0029 and *Quillaja saponaria* saponins (Qs) in BALB/C mice  
777 challenged with 150 cercariae of *S. mansoni*. ANOVA  $F_{(3,17)} 7.246$  and  $p > 0.0024$ , and  
778 post-hoc Tukey's honest significance different (HSD) test  $P$  values are depicted in the  
779 chart. A representative micrograph of each group was included. ♦ represents means.

780 **Figure 5.** Serum antibody responses by ELISA during vaccination trials to SmKB  
781 (A) ANOVA  $F_{(2,15)} 10.910$   $P = 0.0017$ ) and SmKT (B) ANOVA  $F_{(2,15)} 10.672$   
782  $P = 0.0013$ ) of mice vaccinated with AA0029+Qs+SmKB and AA0029+Qs+SmKT  
783 respectively. BALB/c mice were vaccinated using the adjuvant adaptation (ADAD)  
784 vaccination system and then challenged with 150 cercariae of *S. mansoni*. Data are  
785 presented as mean and standard error of the mean. \*  $p < 0.05$  compared to serum sample  
786 before treatments.

787

788 **Table 1.** Effect of vaccination with SmKT and SmKB formulated in the adjuvant adaptation (ADAD) vaccination system on total female and  
 789 male worms counts, and eggs per gram (EPG) trapped in the tissues of BALB/C mice challenged with 150 cercaria of *S. mansoni*. Percentage of  
 790 reduction (R). Data are presented as the mean and standard error of the mean (SEM). ANOVA and post-hoc Tukey's honest significance test  
 791 were used.

| <b>Groups</b>         | <b>Female worms</b>  | <b>R</b>   | <b>Male worms</b>   | <b>R</b>   | <b>EPG in liver</b> | <b>R</b>   | <b>EPG in gut</b>   | <b>R</b>   |
|-----------------------|----------------------|------------|---------------------|------------|---------------------|------------|---------------------|------------|
|                       | <b>(mean ± SEM)</b>  | <b>(%)</b> | <b>(mean ± SEM)</b> | <b>(%)</b> | <b>(mean ± SEM)</b> | <b>(%)</b> | <b>(mean ± SEM)</b> | <b>(%)</b> |
| <b>AA0029+Qs</b>      | 11.5 ± 2.8           | -          | 7.7 ± 1.8           | -          | 11050 ± 2928        | -          | 11223 ± 1609        | -          |
| <b>AA0029+Qs+SmKT</b> | 1.0 ± 0.4*           | 91         | 10.7 ± 3.4          | NR         | 2561 ± 1510*        | 77         | 4872 ± 2666*        | 57         |
|                       | <i>P</i> = 0.0002    |            |                     |            | <i>P</i> = 0.0044   |            | <i>P</i> = 0.0208   |            |
| <b>AA0029+Qs+SmKB</b> | 1.3 ± 0.4*           | 89         | 21.7 ± 4.0          | NR         | 2113 ± 700*         | 81         | 2529 ± 933*         | 77         |
|                       | <i>P</i> = 0.0003    |            |                     |            | <i>P</i> = 0.003    |            | <i>P</i> = 0.0028   |            |
| <b>ANOVA</b>          | $F_{(3,17)}= 10.721$ |            | $F_{(3,17)}=6.787$  |            | $F_{(3,17)}= 6.243$ |            | $F_{(3,17)}= 6.112$ |            |
|                       | <i>P</i> = 0.0003    |            | <i>P</i> = 0.0033   |            | <i>P</i> = 0.0047   |            | <i>P</i> = 0.0052   |            |

792 \* Significant differences in comparison with AA0029+Qs controls. NR no reduction  
 793

| Code           | Sequence                                                    | Id %                                                            |       |
|----------------|-------------------------------------------------------------|-----------------------------------------------------------------|-------|
| A              | Smp_147730                                                  | ---RKGNSDCLLDYDE---GICRAL-LKRFYYDSV-NQTCEIFYYGCCGLGNGNNFLSKEE   |       |
|                | Sjp_0018610                                                 | ----MMNPYCLQLRLVFKCTTCDYLLISPRYFCSR-LRRCRDFEYRGC GGNKNNFEAYQD   | 26.05 |
|                | Sjp_0030350                                                 | ---ETINKICLEPIES---GSCRAS-IQMYAFNVD-QWRCLISFIYGGCDGNSNRFASVEE   | 35.44 |
|                | Sjp_0020270                                                 | ---YSLNPICLQPRVT---GKCRAS-LLRWVWNPQ-ENTCEEFIYGGCGANENNFLTKEE    | 42.03 |
|                | Sjp_0024630                                                 | KKSLTPEEICALPLKQ---GHCLHN-KPRFYYNSS-EKKCLPFTFKGCGGNENRFHTKEG    | 31.58 |
|                | Smp_147730                                                  | CERK-----CGQIYMTEKSFETTKQM---                                   |       |
|                | Sjp_0018610                                                 | CLSD-----CLPFEMEKLKRLQINMARMASMR                                |       |
|                | Sjp_0030350                                                 | CEAT-----CY-----                                                |       |
|                | Sjp_0020270                                                 | CETV-----CKMRINV-----                                           |       |
|                | Sjp_0024630                                                 | CENF-----CIKKSIEKPSDKQ----P---                                  |       |
| B              | Smp_147730                                                  | -----L--LICVQS-----VASYRKGNSDCLLDY-DEGICR                       |       |
|                | MS3_07964                                                   | VANHPISLTRNVFKDRNTCEQLCTNKQIQADAVWNPVVKRETEKLQHKCEQSLMKGSI      | 18.05 |
|                | MS3_00131                                                   | -----MAP-----DIEFENVPSECKQPP-DAGSCQ                             | 31.82 |
|                | MS3_09690                                                   | -----F--LICAQS-----VTSFRKGSVCLLDY-DEGICR                        | 74.62 |
|                | MS3_07690                                                   | -----FPSHKACQD-----ICTPGHPIDVCRPLY-DHGGCS                       | 26.12 |
|                | MS3_09688                                                   | -----IIFGTVHS-----KTHPKTPDEICALPL-KKGYCL                        | 27.68 |
|                | MS3_10748                                                   | -----VVFV-----SLISVTPSEICALPM-KKGYCL                            | 33.85 |
|                | Smp_147730                                                  | ALL--KRFYDSVNTCEIFYYGCCGLGNGNNFLSKEECERKCGQIYMTEKSFETTKQM-      |       |
|                | MS3_07964                                                   | SNKISYSWYDKQFNCLISFEYLGCGYGNENNFRTKEKCIITQCVYRDNTTNDLDQLNLTN-   |       |
|                | MS3_00131                                                   | IKNPSQNFYDLENNDCITSFYFHECGGNDNRFVTKSECMSCSP-----                |       |
| MS3_09690      | ALI--KRFYDRVNKTCEVFYYGCCGLGNRNFLSKQCEQKCNGTIYIKENSS-----    |                                                                 |       |
| MS3_07690      | NFE--KRWYDMHKRMCMPTFYGGCFGNSNRFVTKARCEGFCMGKDVCRLPLQKNSTDTS |                                                                 |       |
| MS3_09688      | QNI--PRFYNSLENKCLPFIYKCGGNENRFKTKEACESMCKKTTMKSINNQSRTTSS   |                                                                 |       |
| MS3_10748      | QKK--PRFYSPAANKCLPFIYSGCGGNENRFRTKEICEGFC-----              |                                                                 |       |
| C              | Smp_147730                                                  | ----FCLYGTLLLICVQSVASR-----KGNSDCLLDYDEGICRALLKRFYDSVNT         |       |
|                | EgrG_000419100                                              | MPVQMSHWLLCLLFI GF AFSF-N-----NFEVPPICRPQLQTANCWYYRPNYVYNHLLD   | 15.45 |
|                | EgrG_000534700                                              | ----MVAAFALFLLVAISFSE-----ARIDFCKLPLDPGFCRAYFPRWGFHQESG         | 37.33 |
|                | EgrG_001137000                                              | ----NLALLLMLLCVASFSQ-----GNEDICSLPIEVGFPCRSHIRAWGFNPKTG         | 28.57 |
|                | EgrG_001136500                                              | ----MIALLPLLLLCVANLSQVNAVEYGCNSGEEDV CNLPMRTGFC LAYFRVWGYNRALD  | 34.57 |
|                | EgrG_001136800                                              | ----MIALLPLLLLCVANFSQVNAIDSGCDSGKEDV CNLPMRTGFC RAYFRVWGYNPASD  | 28.04 |
|                | Smp_147730                                                  | TCEIFYYGCCGLGNGNNFLSKEECERKCGQIYMTEKSFETTKQME----TTSTSIDRSD     |       |
|                | EgrG_000419100                                              | FCIWSGWSSCNSKLN SFKTRRECELC LGGRRRSSPRLQESDEYYSQGFYGEVPPQKRYW   |       |
|                | EgrG_000534700                                              | ECVRFIYGGCGGNKNQFHSKEQCESMCGH-----                              |       |
|                | EgrG_001137000                                              | QCINRVYSGCCGNANRFKHRRACERACLKSSPSTKD-----                       |       |
| EgrG_001136500 | FCESFIYGGCGGNANRFKFKKCECERACVKNLHL-----                     |                                                                 |       |
| EgrG_001136800 | QCESFVYGGCGGNANQFKEKIECERACVKNLHLYKHKLLSRQTIF----GKVSALLLLL |                                                                 |       |
| D              | Smp_147730                                                  | --MFSFCLYGTLLLICVQSVAS-----YR---KG-NSDCLLDYDEGICRALLKRFYYD      |       |
|                | EmuJ_000419100                                              | PVQMSHW-----LLCLLFI-----GF AFSFNNFEVPPICRPQLQTANCWYYRPNYVYN     | 14.41 |
|                | EmuJ_001136800                                              | ----MIALLPLLLLCVANLSQVNAVYGYGFD---SGEEDV CNLPMRTGFC LAYFRVWGYN  | 35.80 |
|                | EmuJ_001136500                                              | ----MIALLPLLLLCVANLSQVNAVYGYGFD---SGEEDV CNLPMRTGFC LAYFRVWGYN  | 35.80 |
|                | EmuJ_001136700                                              | ---MTKLLLLALMLLCVVCLS-----QGRADICNLKIERGNCQSHIKVYGYN            | 35.06 |
|                | EmuJ_001137000                                              | ---MTNLALLLMLLGVASFS-----QGNEDICSLPIEVGFPCR SRIRAWGFN           | 30.12 |
|                | EmuJ_001136600                                              | ---MTKLALLALMLLCVASLS-----QGEEDICSLPIRVGICRFRISVWGFN            | 32.53 |
|                | Smp_147730                                                  | SVNQTCEIFYYGCCGLGNGNNFL-SKEECERKCGQIYMTEKSFETTKQMETTSTSIDRSD    |       |
|                | EmuJ_000419100                                              | HLLDRCIWSGWSSCNSKLN SFK-TRRECELC LGGRRRSSPRLQESDEYYSQGFYGEVPPQ  |       |
|                | EmuJ_001136800                                              | RALDQCESFIYGGCGGNANRFE-EKKECERTCVKNLHL-----                     |       |
| EmuJ_001136500 | RALDQCESFIYGGCGGNANRFE-EKKECERTCVKNLHL-----                 |                                                                 |       |
| EmuJ_001136700 | RKKGHCEHFIYSGCGGNANRFN-DRSECKRVCGNP-----                    |                                                                 |       |
| EmuJ_001137000 | PKTGQCINRVYGGCGGNANRFK-HRRACERACLKSSPSTKD-----              |                                                                 |       |
| EmuJ_001136600 | SKKGHCVNFLYSGCMGNANRFV-DRRT CERACLKSSPSKKH-----             |                                                                 |       |
| E              | Smp_147730                                                  | --MFSFCLYGTLLLICVQSVAS YRKGNSDCLLDYDEGICRALLKRFYDSVNTCEIFY      |       |
|                | CEL12049.1                                                  | MRCFTTIAVLLATLII-AVTIESGAAIQKRCCLLPVEPGFC LGGIRSWAWDSRQRECVPFVY | 32.93 |
|                | PIS91154.1                                                  | MRCFTTIAVLLATLII-AVTIESGAAIQKRCCLLPVESGFC LGGIRSWAWDSRQRECVPFVY | 32.93 |
|                | CEL12048.1                                                  | MRCFTTIAVLLATLII-AVTIESGAAIQKRCCLLPVEPGFC LGGIRSWAWDSRQRECVPFVY | 32.93 |
|                | Smp_147730                                                  | GGCGLGNGNNFLSKEECERKCGQIYMTEKSFETTKQMETTSTSIDRSDNTETTITTTQKPL   |       |
| CEL12049.1     | GGCGGNKNRHFHSKRSCEYNCGFRFQ-----                             |                                                                 |       |
| PIS91154.1     | GGCEGNDNRFDSKSSCEYNCGFRFQ-----                              |                                                                 |       |
| CEL12048.1     | GGCGNDNRFDSKSSCEYNCGFRFQ-----                               |                                                                 |       |

**A**

genome coords. Chromosome 2

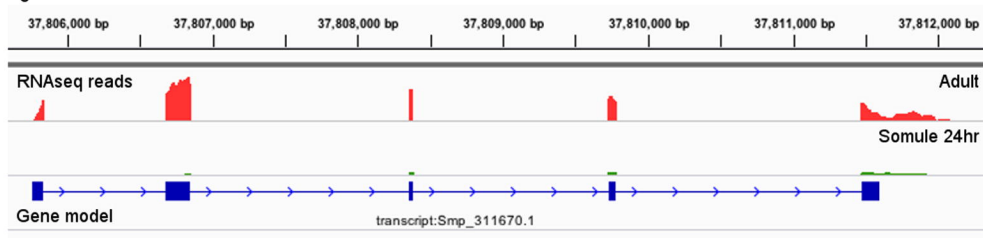**B**

Fold Change (Log2)

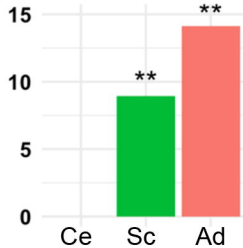

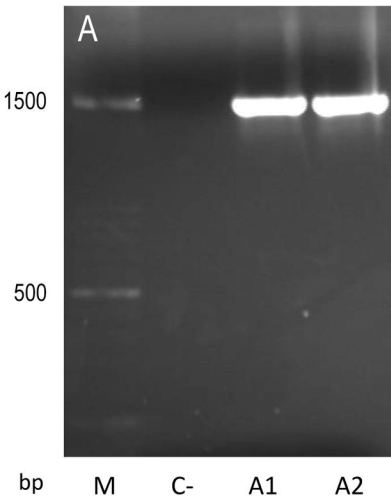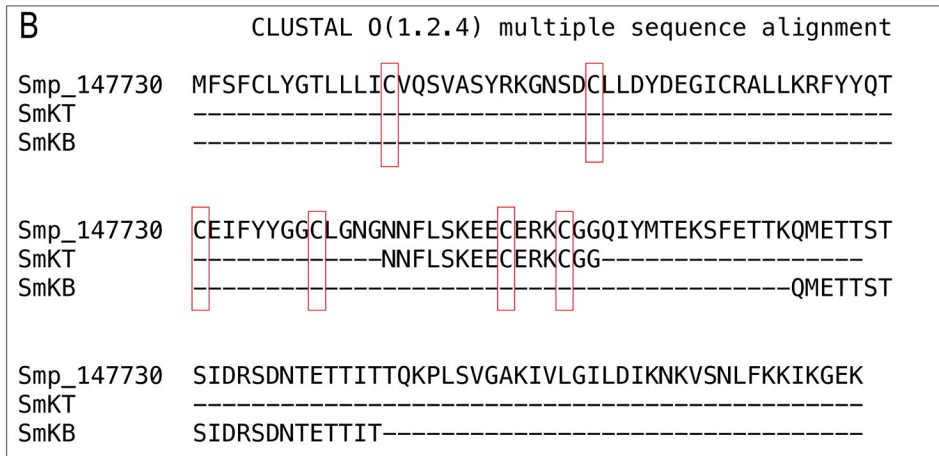

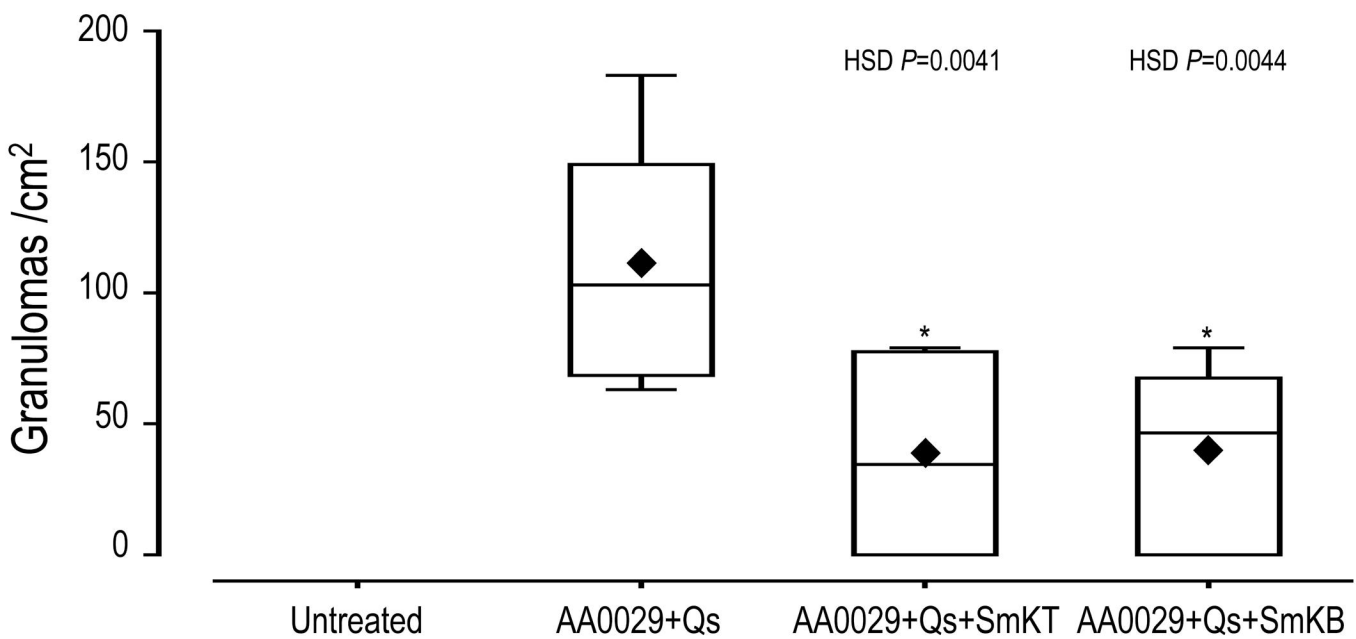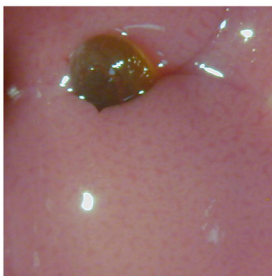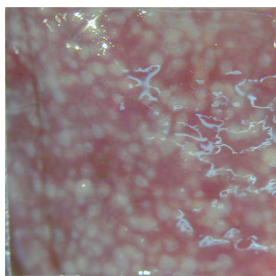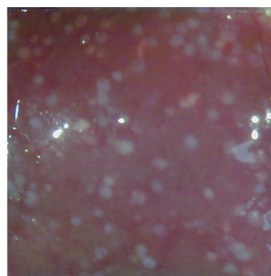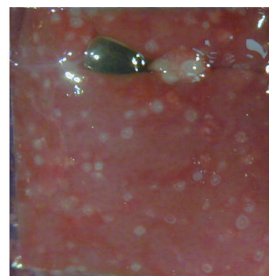

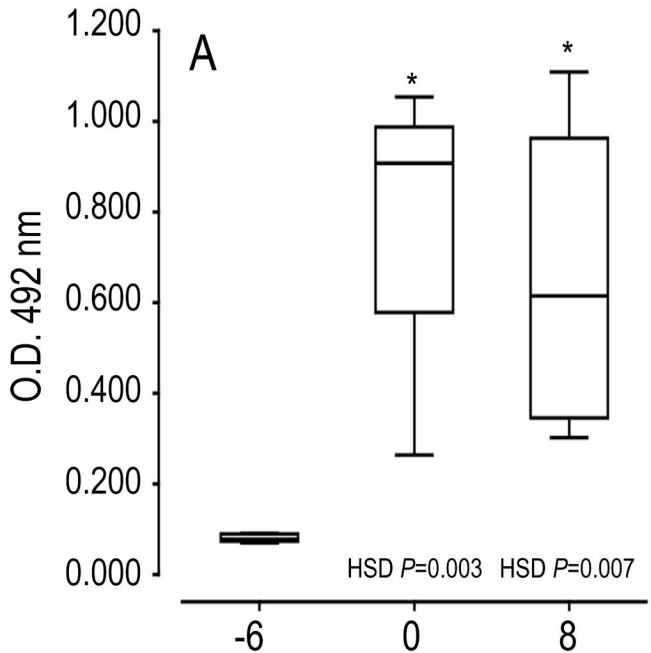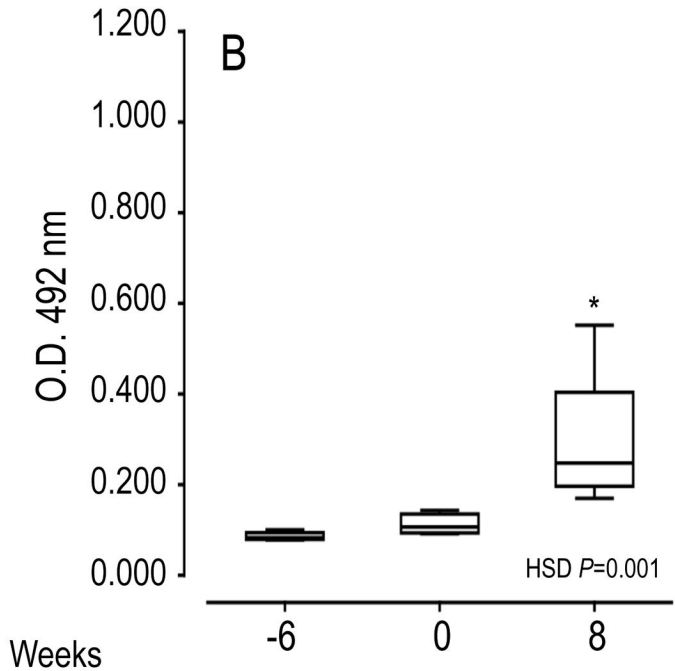

Source: https://www.biorxiv.org/content/10.1101/634360v1.full.pdf
